# Supplementary material for: Resource utilization of organic spent adsorbent to prepare three-dimensional sulfate-functionalized layered double oxide for superior removal of azo dye
Source: Research Square preprint supplement (doi:10.21203/rs.3.rs-340259/v1), 2021-04-06
Supplement: Supplementary file 1 [file 50a6fa3f0492910f314bf4ce.docx]

**Supporting Information**

**Resource utilization of organic spent adsorbent to prepare three-dimensional sulfate-functionalized layered double oxide for superior removal of azo dye**

**Lingjie Zhang****1** **· Siyin Zheng1 · Peng Li2 · Zhongbang Zhu1 · Youqin Zou1 · Ping Zhang 1,***

1.Key Laboratory of Poyang Lake Environment and Resource Utilization, Ministry of Education, School of Resources Environmental and Chemical Engineering, Nanchang University, Nanchang 330031, P. R. China

2.Australian Institute for Bioengineering and Nanotechnology, The University of Queensland, Brisbane, QLD 4072, Australia

*Corresponding author:

Ping Zhang, Email: zhangping@ncu.edu.cn


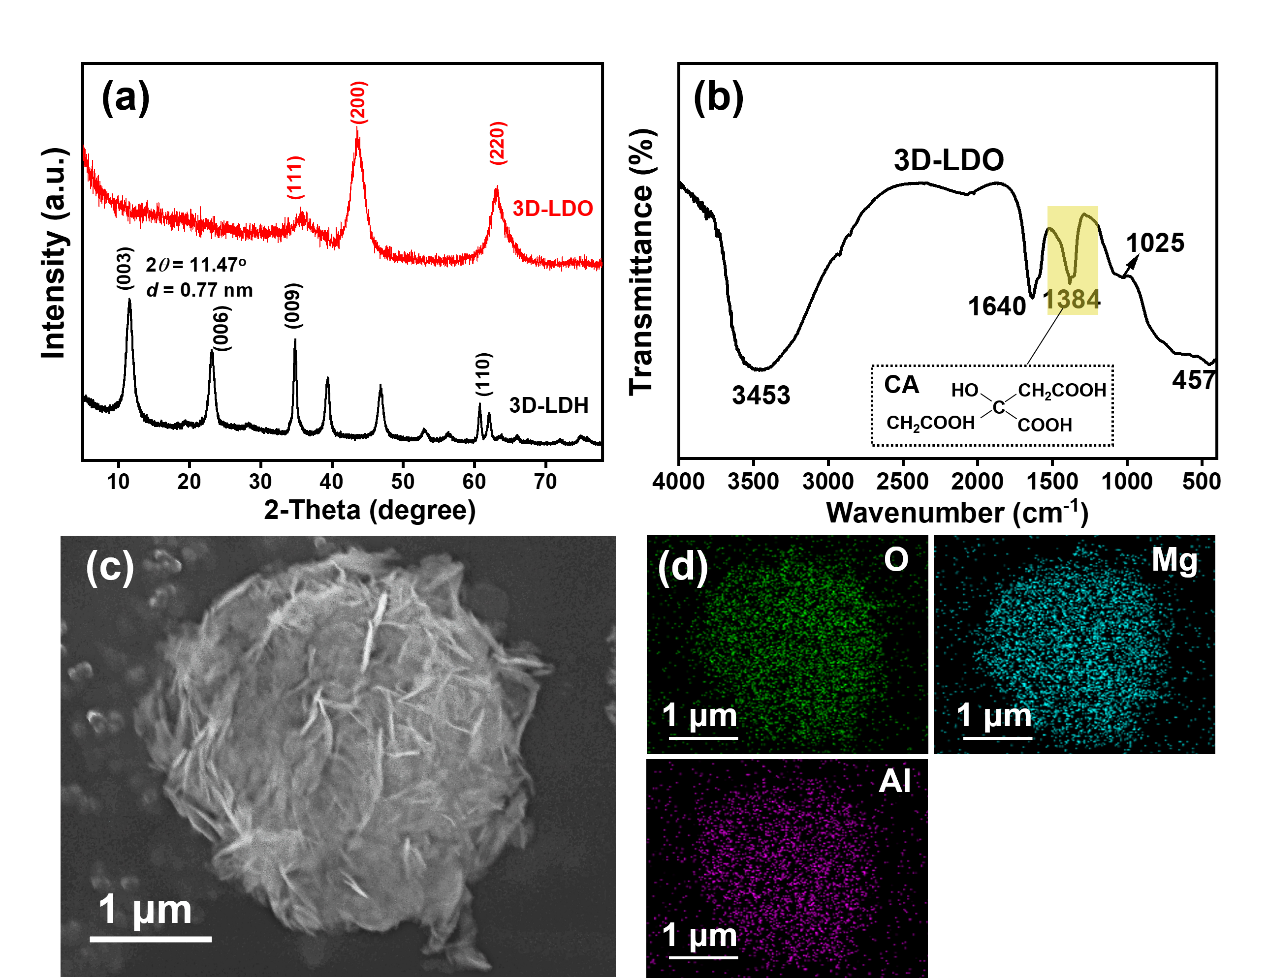


**Fig. S1** XRD patterns of 3D-LDH and 3D-LDO (a); FT-IR spectrum (b), SEM image (c), and Element mapping images (d) of 3D-LDO

(a) The characteristic peaks of 3D-LDH at 2*θ*=11.47°, 23.12°, 34.93°, 60.68°corresponding to the (003), (006), (009), (110) planes were well allocated to the typical phases of MgAl LDHs (Li et al. 2008). After calcination, a series of new peaks belonged to LDO (MgAl2O4) emerged for 3D-LDO accompanying with the disappearance of LDH peaks, suggesting the successful conversion from LDH to LDO (Lei et al. 2017); (b) The broad bands near 3453, 1640 and 457 cm-1 were associated with the hydroxyl group, the interlayer water molecules, and M-O band, respectively. And the peak at 1384 cm-1 was ascribed to -COO-group stretching vibration of citric acid (Tran et al. 2018); (c-d) The SEM image and Element mapping images confirmed the 3D flower-like structure of 3D-LDO composed of O, Mg, and Al elements.


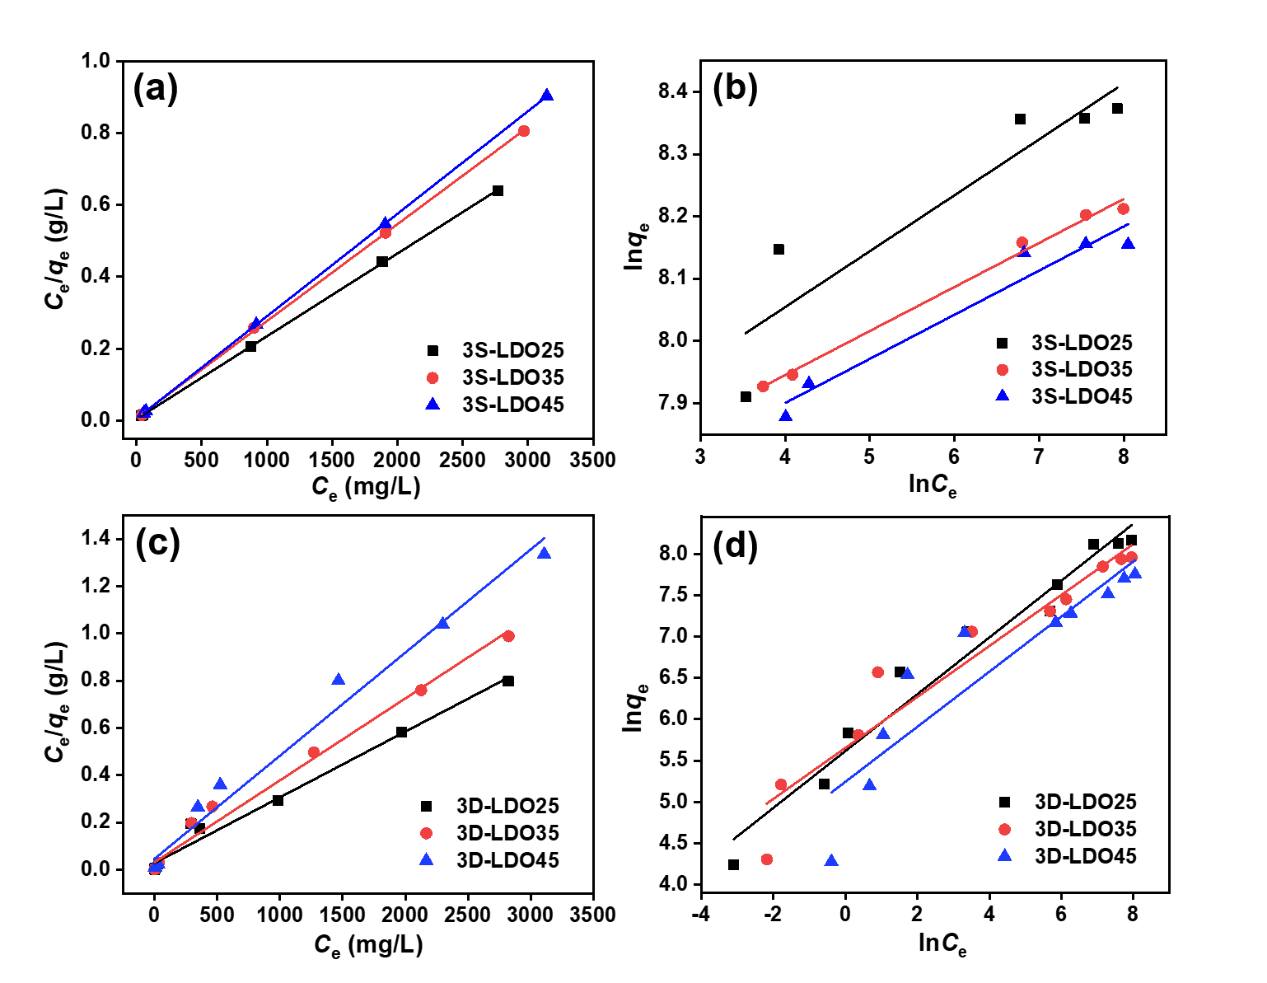


**Fig. S2** Liner fitting curves for MO adsorption on 3S-LDO and 3D-LDO by Langmuir isotherm (a and c) and Freundlich isotherm (b and d)


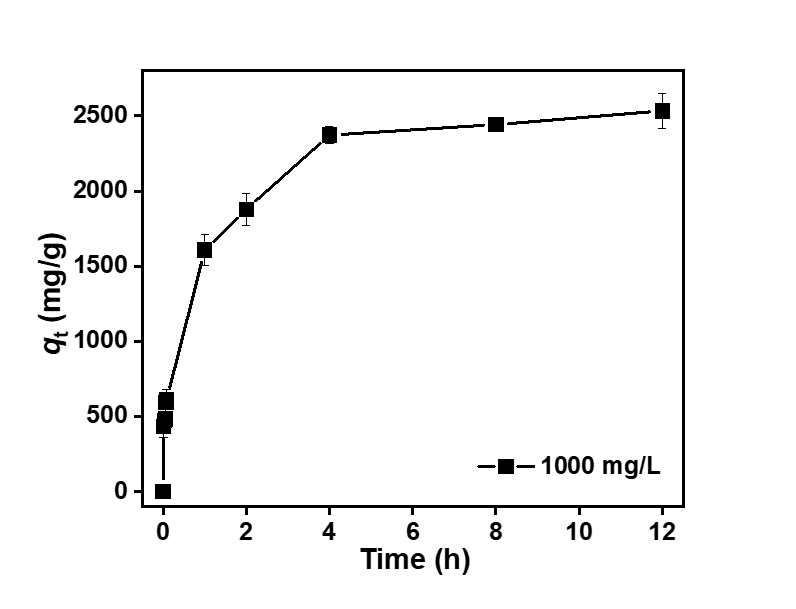


**Fig. S3** Effect of contact time on the MO adsorption by 3D-LDO


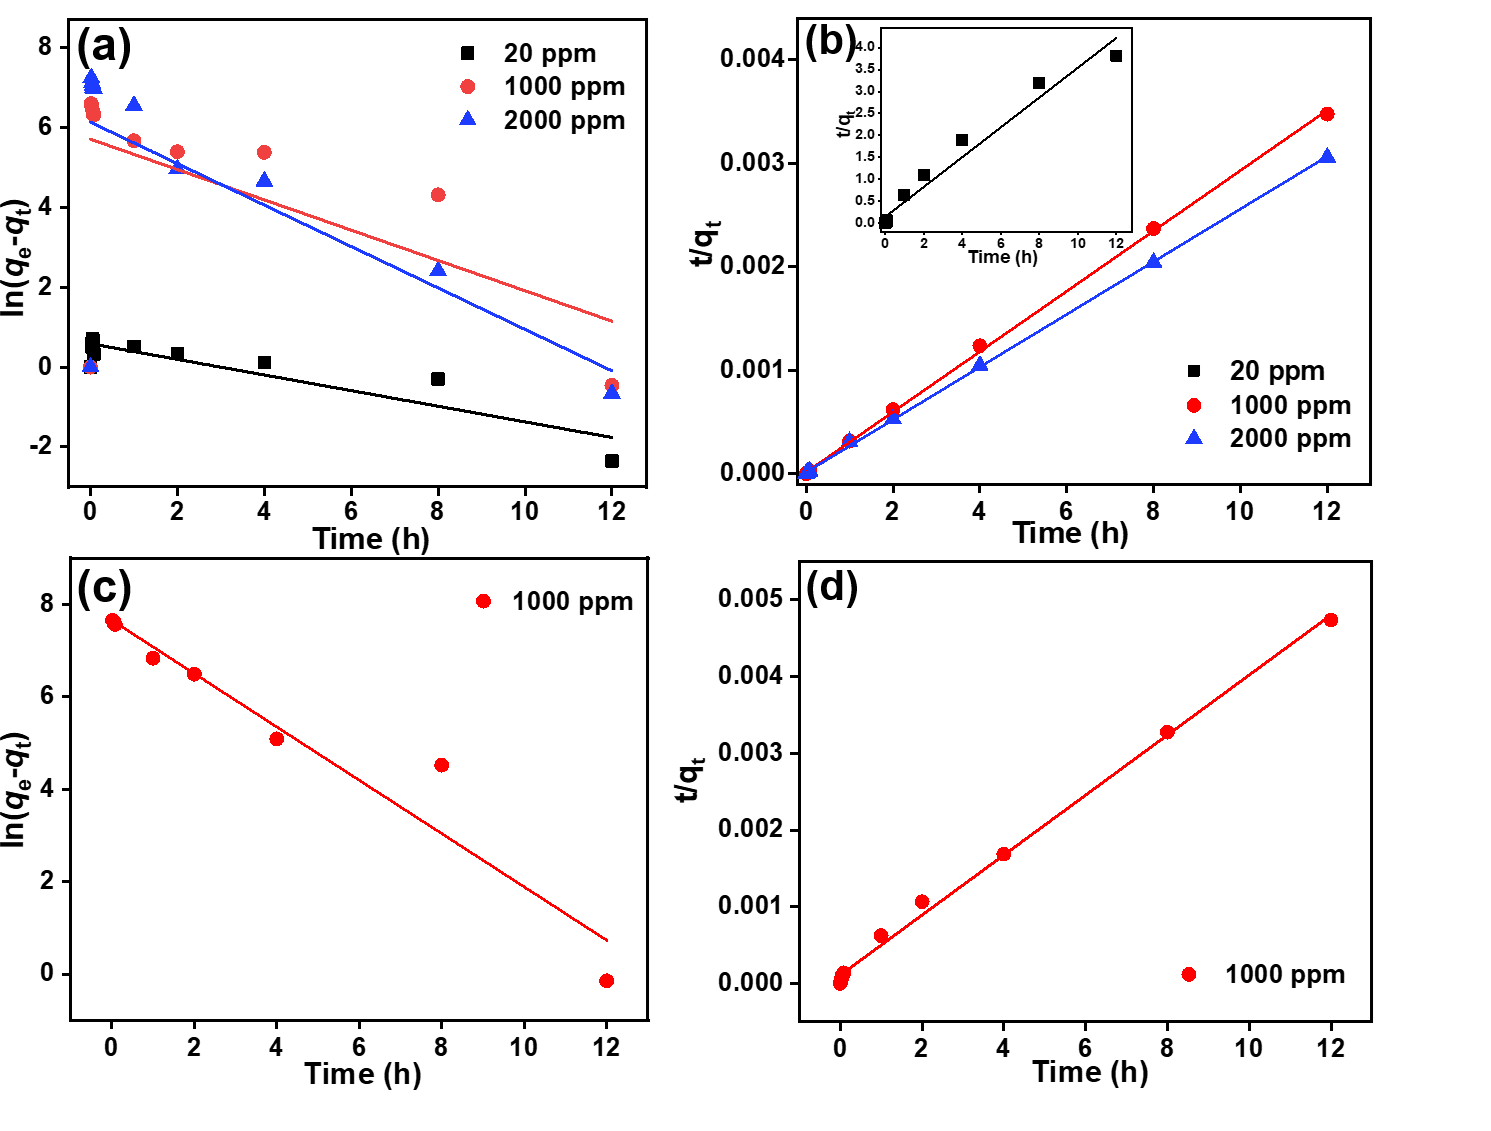


**Fig. S4** Liner fitting curves for MO adsorption on 3S-LDO and 3D-LDO by pseudo-first-order (a and c) and pseudo-second-order (b and d) kinetic models


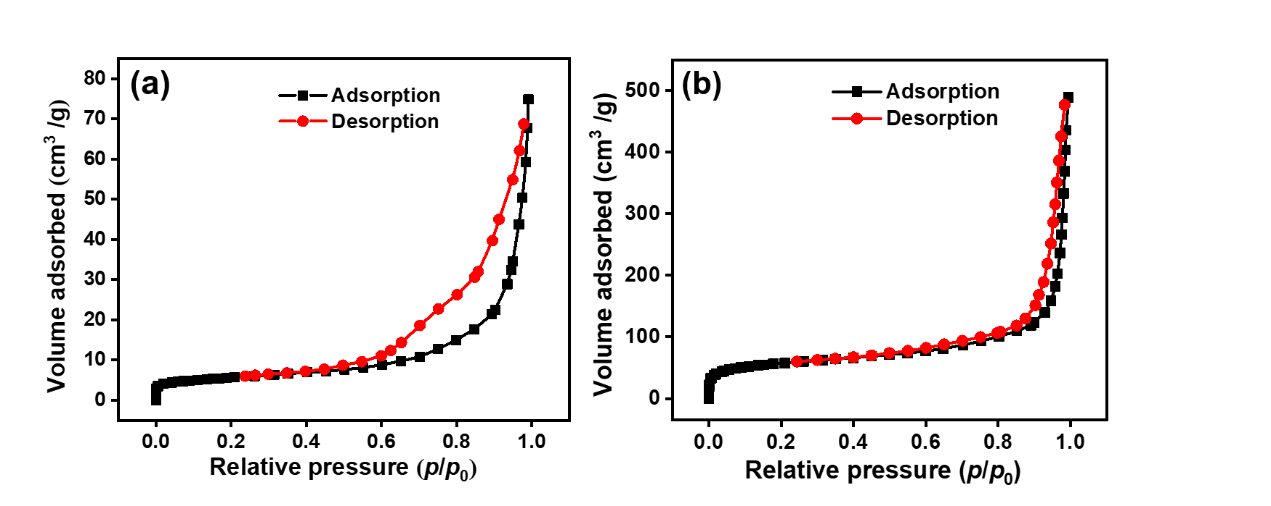


**Fig. S5** N2 adsorption–desorption isotherm of 3S-LDO (a) and 3D-LDO (b)


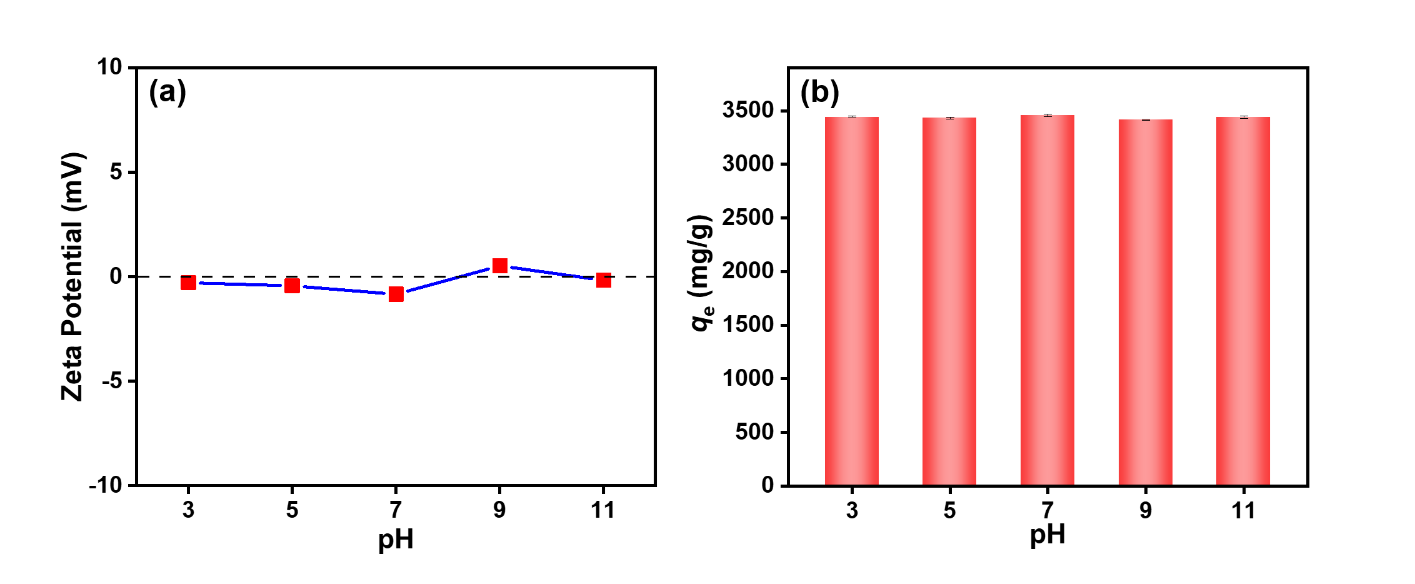


**Fig. S6** Zeta-potential of 3S-LDO as a function of pH (a); Effect of pH on the MO adsorption by 3S-LDO (b)

**Table S1** The release of Mg2+, Al3+, and SO42- of 3S-LDO (1 g/L) in deionized water

| Sample | The amounts of released ions (mg/g) | | |
| --- | --- | --- | --- |
| Mg2+ | Al3+ | SO42- |
| 3S-LDO | 68.90 | 0.57 | 4.41 |
| 3D-LDO | 24.47 | 1.96 | - |

**Table S2** Parameters for adsorption thermodynamic of MO on 3S-LDO and 3D-LDO

| Samples | △*H*0 (kJ/mol) | △*S*0 (J/(mol·K)) | △*G*0 (kJ/mol) | | | *R*2 |
| --- | --- | --- | --- | --- | --- | --- |
| 25 °C | 35 oC | 45 oC |
| 3S-LDO | -13.79 | -42.158 | -3.91 | -1.66 | -1.59 | 0.9702 |
| 3D-LDO | -20.25 | -65.931 | -3.04 | -1.79 | -0.59 | 0.9864 |

**Table S3** Surface parameters of 3S-LDO and 3D-LDO

| Samples | Specific surface area (m2/g) | Total pore volume (cm3/g) | Average pore diameter (nm) |
| --- | --- | --- | --- |
| 3S-LDO | 19.64 | 0.11 | 22.75 |
| 3D-LDO | 206.02 | 0.70 | 13.63 |

# References

Lei C, Zhu X, Zhu B, Jiang C, Le Y, Yu J (2017) Superb adsorption capacity of hierarchical calcined Ni/Mg/Al layered double hydroxides for Congo red and Cr(VI) ions. J Hazard Mater 321:801-811. https://doi:10.1016/j.jhazmat.2016.09.070

Li B, He J, Evans DG (2008) Experimental investigation of sheet flexibility of layered double hydroxides: One-pot morphosynthesis of inorganic intercalates. Chem Eng J 144:124-137. https://doi:https://doi.org/10.1016/j.cej.2008.06.031

Tran HN, Lin CC, Woo SH, Chao HP (2018) Efficient removal of copper and lead by Mg/Al layered double hydroxides intercalated with organic acid anions: Adsorption kinetics, isotherms, and thermodynamics. Appl Clay Sci 154:17-27. https://doi:10.1016/j.clay.2017.12.033
